# Supplementary material
Source: PubMed Central journal article supplement (PMC5272174)
Supplement: jci-127-87588-s001.pdf [file jci-127-87588-s001.pdf]

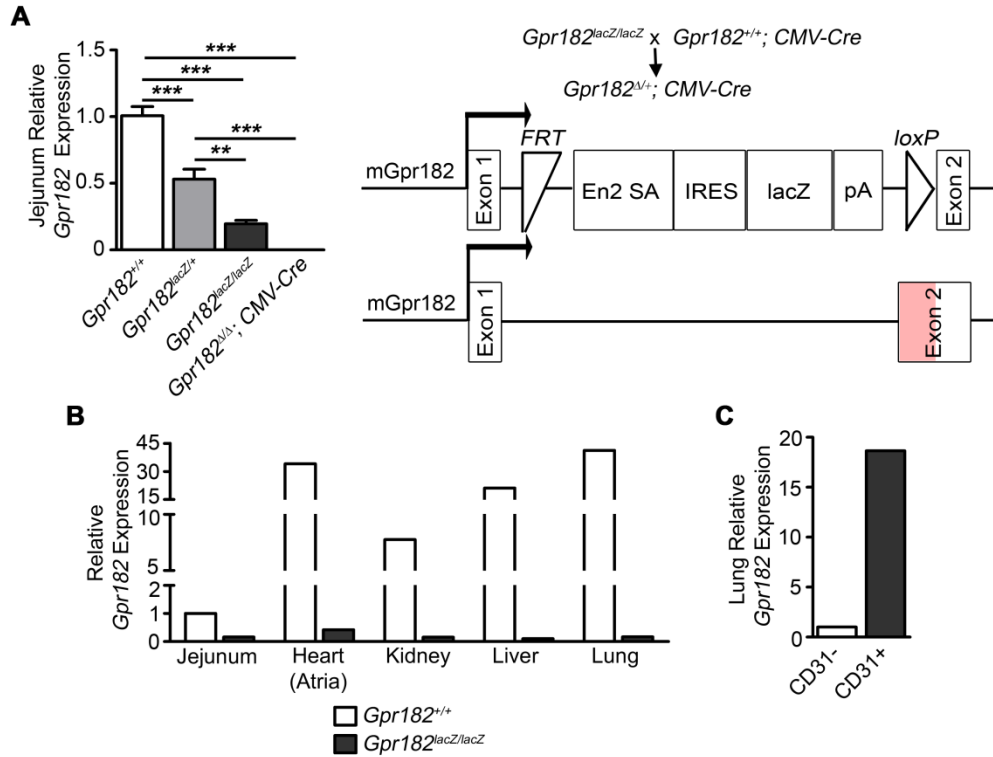

**Supplemental Figure 1: Relative murine *Gpr182* expression in numerous adult tissues.** (A) Relative *Gpr182* expression in adult jejunum from *Gpr182*<sup>+/+</sup>, *Gpr182*<sup>lacZ/+</sup>, *Gpr182*<sup>lacZ/lacZ</sup>, *Gpr182*<sup>Δ/+</sup>; CMV-Cre mice. Biological n = 3-5 mice per genotype. The generation of the *Gpr182*<sup>Δ/+</sup>; CMV-Cre mouse model by crossing *Gpr182*<sup>lacZ/lacZ</sup> mice to *Gpr182*<sup>+/+</sup>; CMV-Cre mice. The *Gpr182* protein coding region is shaded pink. (B) Relative *Gpr182* expression in whole jejunum, atria, kidney, liver, and lung from adult *Gpr182*<sup>+/+</sup> and *Gpr182*<sup>lacZ/lacZ</sup> mice. Data normalized to *Gpr182*<sup>+/+</sup> jejunum, *Gapdh*, and *18S*. (C) Relative *Gpr182* expression in CD31- and CD31+ endothelial cells isolated from adult *Gpr182*<sup>+/+</sup> lung. Expression normalized to CD31- and *Gapdh*. Significance was determined by 1-way ANOVA with Tukey's Multiple Comparison Test.

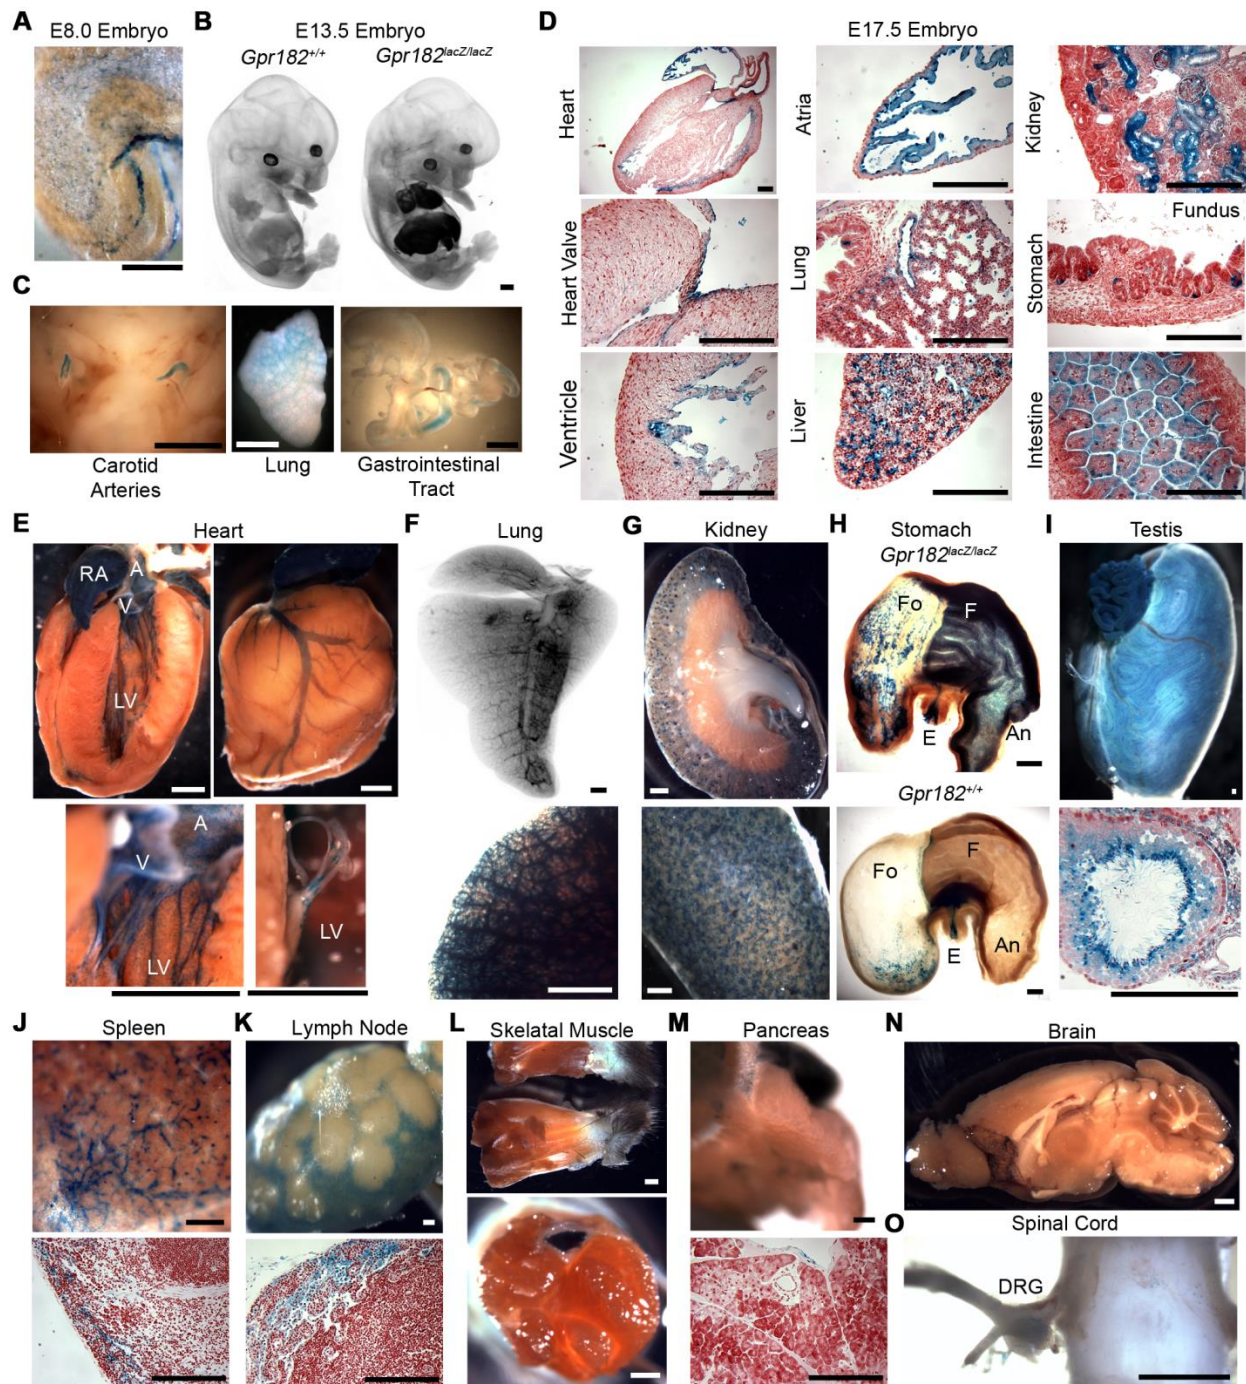

**Supplemental Figure 2: Additional murine *Gpr182* expression during development and adulthood.** Representative whole mount X-gal staining of *Gpr182<sup>lacZ/lacZ</sup>* tissue during development (A-D) and adulthood (E-O). X-gal staining (A) of an E8 embryo, (B) OPT, and (C) microdissected of an E13.5 embryo. (D) *Gpr182<sup>lacZ</sup>* in heart, lung, liver, kidney, stomach, and small intestine of an E17.5 embryo. Representative images of X-gal staining in adult heart (E), lung OPT (F), kidney (G), stomach (H), testis (I), spleen (J), mesenteric lymph node (K), hindlimb skeletal muscle (L), pancreas (M), brain (N), and spinal cord (O). (E) LV, left ventricle; RA, right atria; V, cardiac valve; A, aorta; (H) E, esophagus; Fo, forestomach; F, fundus; An,

antrum; **(O)** DRG, dorsal root ganglia. X-gal sections were counterstained with Neutral Red **(D, I-K, M)**. Scale bars represent 200  $\mu\text{m}$  **(A,D,I-K,M)** or 1 mm **(B-C,E-H,L,N,O)**.

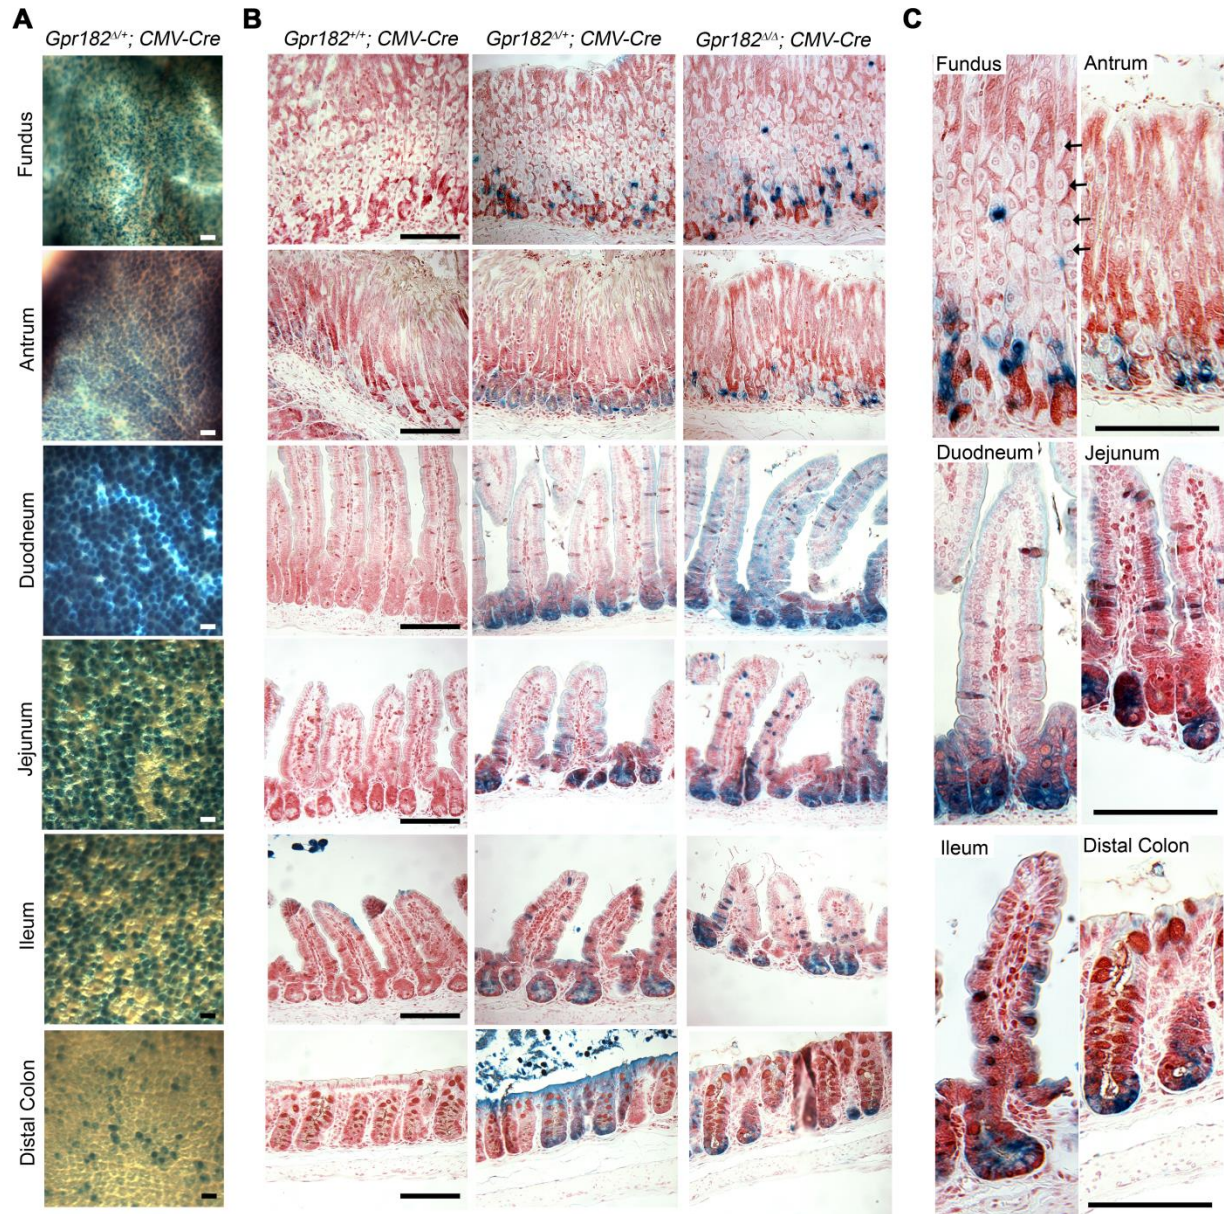

**Supplemental Figure 3: *Gpr182* knockout does not alter X-gal expression pattern or cell markers.** (A) Representative whole mount X-gal stained stomach, small intestine, and colon of adult *Gpr182<sup>Δ/+</sup>; CMV-Cre* mice. (B) Representative cross-sections from whole mount X-gal stained stomach, small intestine, and colon from *Gpr182<sup>+/+</sup>*, *Gpr182<sup>Δ/+</sup>*, *Gpr182<sup>Δ/Δ</sup>* mice. (C) Higher magnification of X-gal stained stomach, small intestine, and colons from *Gpr182<sup>Δ/+</sup>* or *Gpr182<sup>Δ/Δ</sup>* mice. Arrows mark parietal cells identified by histology. Scale bars represent 100  $\mu$ m.

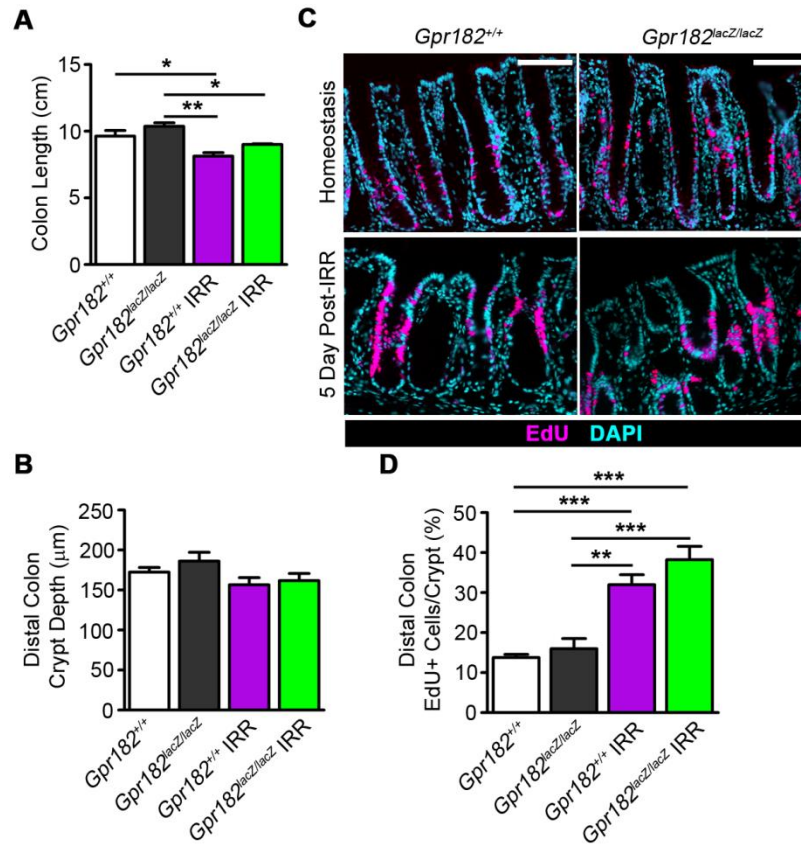

**Supplemental Figure 4: *Gpr182* knockdown does not significantly alter homeostatic or regenerative proliferation in the distal colon.** (A) Colon length from adult *Gpr182*<sup>+/+</sup> and *Gpr182*<sup>lacZ/lacZ</sup> mice both basally and 5d following 14 Gy irradiation (IRR). (B) Histological quantification of distal colon crypt depth between *Gpr182* genotypes. (C) Representative images and (D) EdU incorporation quantification of distal colon proliferation between *Gpr182*<sup>+/+</sup> and *Gpr182*<sup>lacZ/lacZ</sup> animals. Biological n = 3-5 mice per genotype. Scale bars represent 100 μm. Significance was determined either by the 1-way ANOVA with Tukey's Multiple Comparison Test.

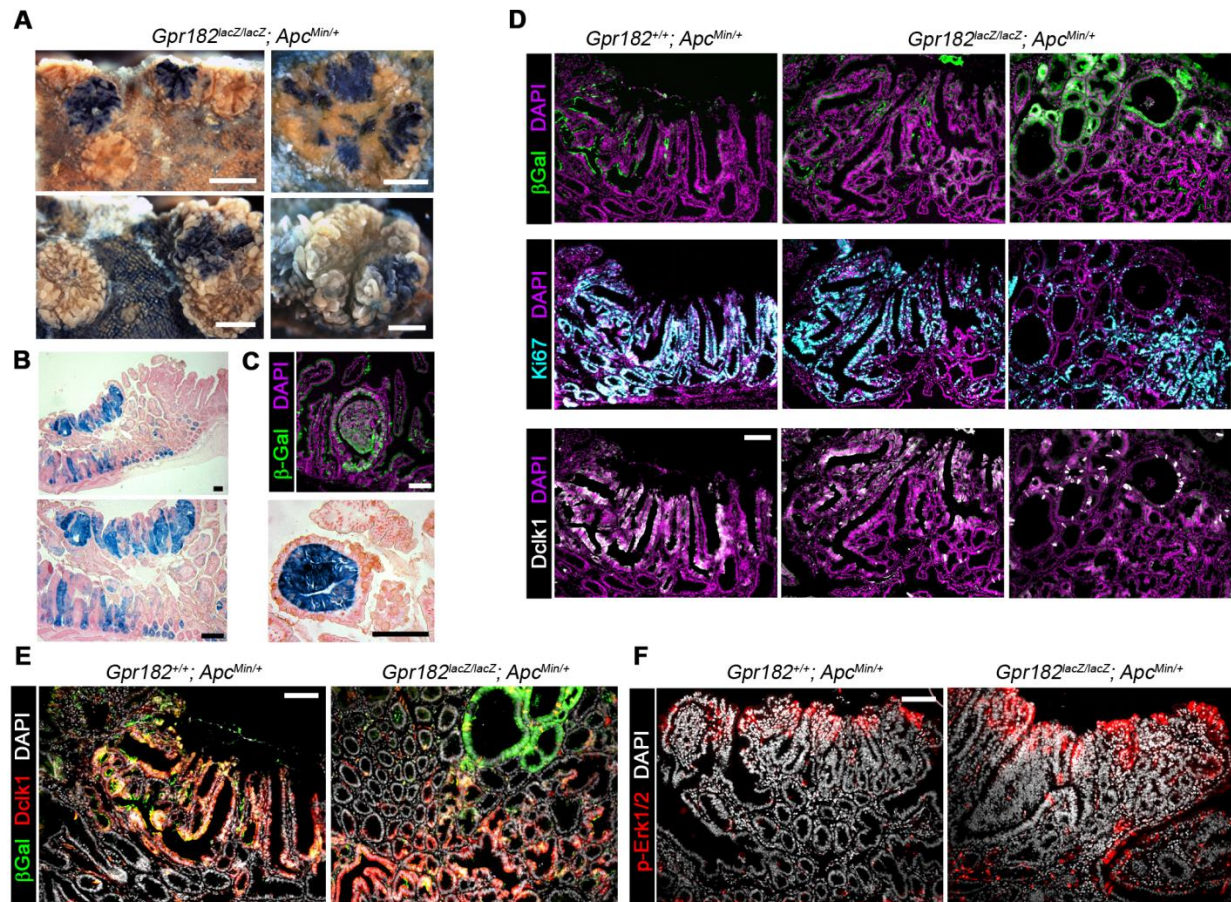

**Supplemental Figure 5: Mosaic *Gpr182* staining within polyps corresponded to polyp proliferation heterogeneity.** Macroscopic (**A**) and histologic (**B-D**) X-gal staining of *Gpr182<sup>lacZ/lacZ</sup>; Apc<sup>Min/+</sup>* polyps. (**D**) Serial sections stained with  $\beta$ -gal (green), Ki67 (blue), Dcl1 (white), and DAPI (magenta) in *Gpr182<sup>+/+</sup>* and *Gpr182<sup>lacZ/lacZ</sup>* polyps. (**E**) Costain  $\beta$ -gal (green), Dcl1 (red), and DAPI (white) polyp from *Gpr182<sup>+/+</sup>* and *Gpr182<sup>lacZ/lacZ</sup>* mice. (**F**) Phospho-Erk1/2 (red) staining in polyps from *Gpr182<sup>+/+</sup>* and *Gpr182<sup>lacZ/lacZ</sup> Apc<sup>Min/+</sup>* mice. Scale bars represent 1 mm (**A**) and 100  $\mu$ m (**B-F**).

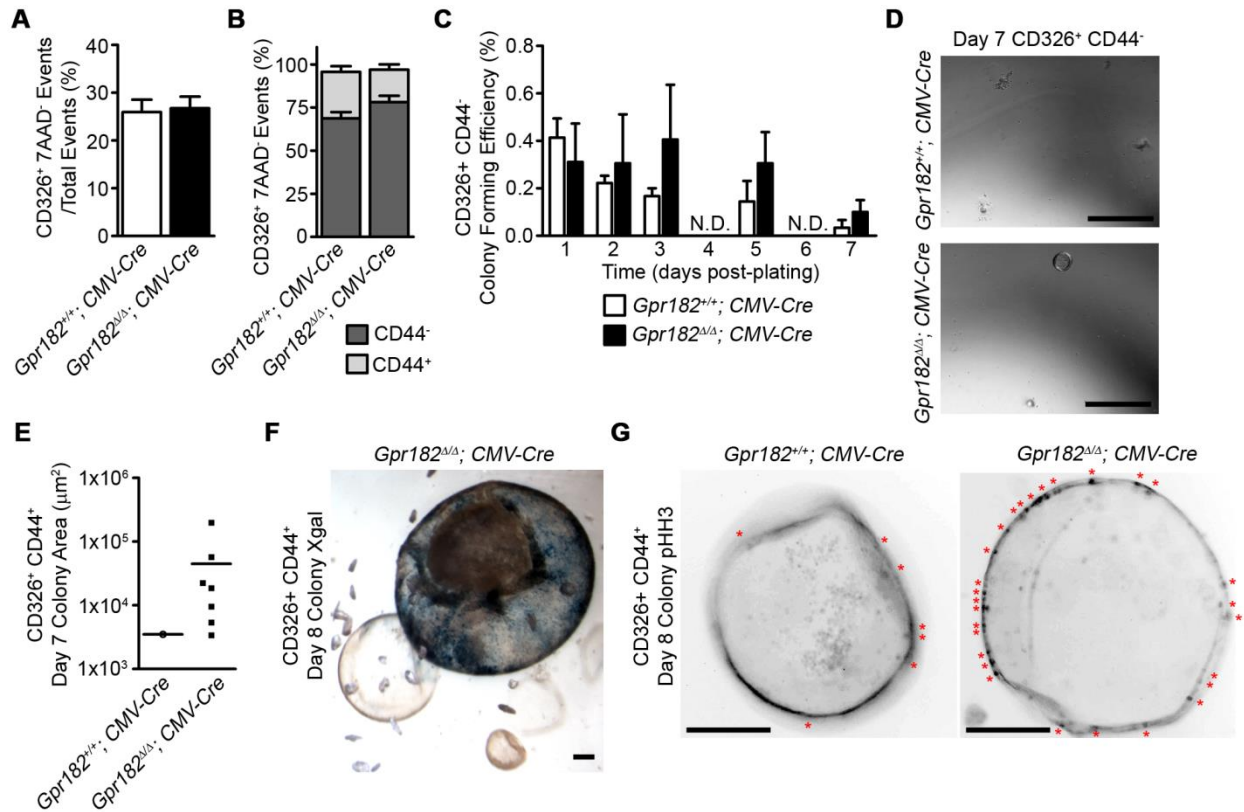

**Supplemental Figure 6: Loss of *Gpr182* does not significantly increase the growth efficiency of single CD44<sup>-</sup> epithelial cells ex vivo.** (A) Percentage of viable CD326<sup>+</sup> epithelial cells from *Gpr182*<sup>+/+</sup>; CMV-Cre and *Gpr182*<sup>Δ/Δ</sup>; CMV-Cre jejunum. (B) Percentage of viable CD326<sup>+</sup> epithelium that are CD44<sup>+</sup> and CD44<sup>-</sup>. (C) Growth efficiency of single CD326<sup>+</sup>CD44<sup>-</sup> cells isolated from *Gpr182*<sup>+/+</sup>; CMV-Cre and *Gpr182*<sup>Δ/Δ</sup>; CMV-Cre jejunum cultured for 7 d ex vivo. One thousand CD326<sup>+</sup>CD44<sup>-</sup> cells were initially plated in triplicate per mouse. (D) Representative images of CD326<sup>+</sup>CD44<sup>-</sup> organoids following 7 d in culture. (E) Area quantification of CD326<sup>+</sup>CD44<sup>-</sup> colonies following 7 d in culture. Representative images of (F) X-gal or (G) phospho-histone H3 (red asterisk) stained organoids from CD326<sup>+</sup>CD44<sup>+</sup> colonies from *Gpr182*<sup>+/+</sup>; CMV-Cre and *Gpr182*<sup>Δ/Δ</sup>; CMV-Cre following 8 d in culture. Scale bars represent 500 μm (D) and 100 μm (F-G). Biological n = 3 mice. Significance was determined by two-tailed Student's T-test.

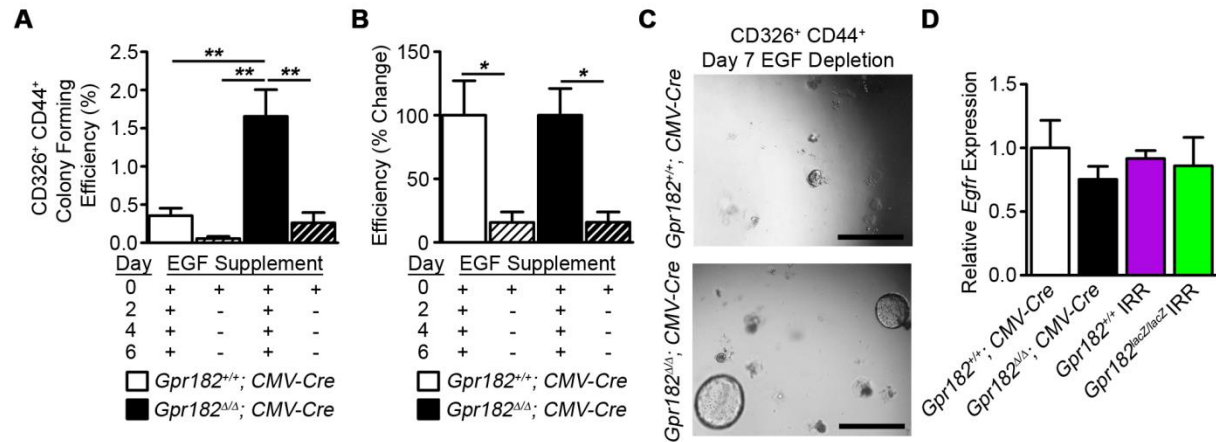

**Supplemental Figure 7: Single CD326<sup>+</sup>CD44<sup>+</sup> cells require exogenous EGF supplementation.** (A) Growth efficiency of single CD326<sup>+</sup>CD44<sup>+</sup> cells isolated at 7 d from *Gpr182*<sup>+/+</sup>; CMV-Cre and *Gpr182*<sup>Δ/Δ</sup>; CMV-Cre jejunum. Following 2 d in culture EGF was either supplemented (solid bars) or excluded (striped bars). One thousand CD326<sup>+</sup>CD44<sup>+</sup> cells were initially plated in triplicate per mouse. (B) Growth efficiency at 7 d as a percent change compared to normalized EGF supplemented CD326<sup>+</sup>CD44<sup>+</sup> cells. (C) Representative images of organoids following 7 d in culture (5d without EGF supplementation). (D) Relative expression of *Egfr* of whole jejunum from *Gpr182*<sup>+/+</sup>; CMV-Cre and *Gpr182*<sup>Δ/Δ</sup>; CMV-Cre mice and 5 d post-IRR *Gpr182*<sup>+/+</sup> and *Gpr182*<sup>lacZ/lacZ</sup> jejunum. Expression was normalized to *Gpr182*<sup>+/+</sup>; CMV-Cre and 18S. Scale bars represent 500 μm. Biological n = 3 mice. Significance was determined by 1-way ANOVA with Tukey's Multiple Comparison Test.

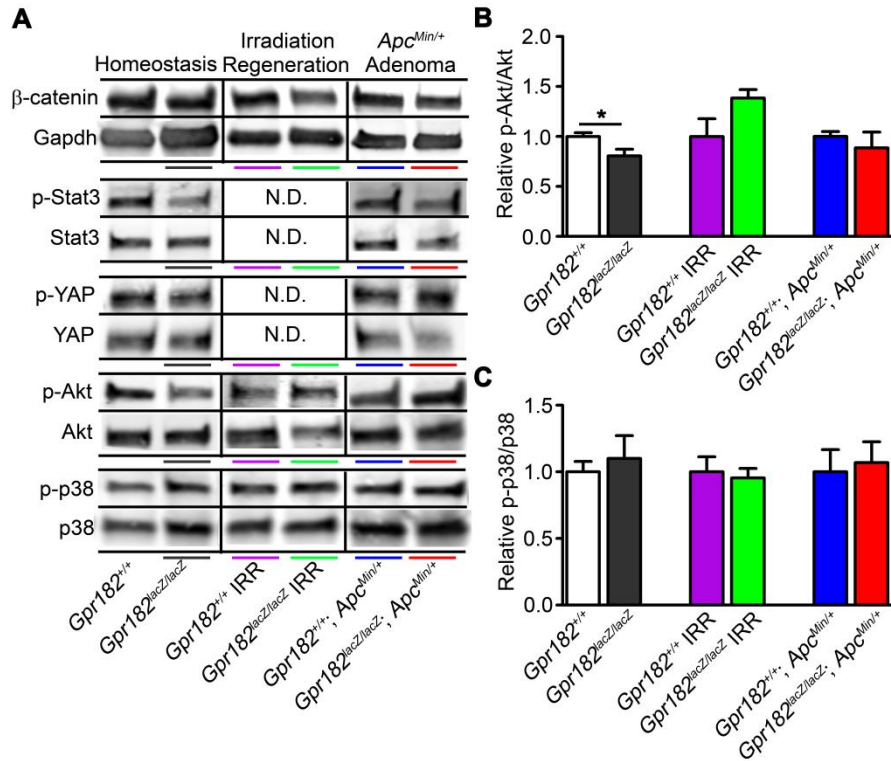

**Supplemental Figure 8: *Gpr182* knockdown does not alter signaling through p38 MAPK, Akt, YAP, or Stat3.** (A) Representative immunoblots of relative β-catenin and phosphorylated p38, Akt, YAP, and Stat3 between *Gpr182*<sup>+/+</sup> and *Gpr182*<sup>lacZ/lacZ</sup> from unchallenged, 5 d post-IRR, and *Apc*<sup>Min/+</sup> polyps of whole jejunum. Samples were normalized to Gapdh, total p38, Akt, YAP, Stat3 and *Gpr182*<sup>+/+</sup>. Quantification of relative phosphorylated (B) Akt and (C) p38 normalized to total Akt or p38. n = 3-10 mice per genotype per condition. Significance was determined by unpaired T-test.

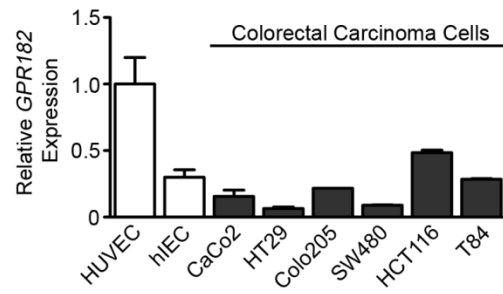

**Supplemental Figure 9: Low *GPR182* expression in human colorectal cell lines.** Relative *GPR182* expression in human cell lines, including a panel of colorectal carcinoma cell lines, intestinal epithelial cell (hIEC), and HUVECs. Expression was normalized to HUVECs and *GAPDH*. n = 2-4 per cell line.

| Allele                                                     | Forward Primer (5' – 3')      | Reverse Primer (5' – 3')           | Taqman Probe  |
|------------------------------------------------------------|-------------------------------|------------------------------------|---------------|
| <b><i>Gpr182</i> Wild-type</b>                             | CTGCAGCCTCCTGGCACT<br>AACAGC  | CATTGTCCGGTTCCAAG<br>GTGGAGAC      |               |
| <b><i>Gpr182</i><sup>tm2a(KOMP)Wtsi</sup><br/>Targeted</b> | GAGATGGCGCAACGCAAT<br>TAAT    | GGGAGGATACCACAGGG<br>AAATAGAGC     |               |
| <b><i>Gpr182 lacZ</i><br/>Targeted</b>                     | TTCACTGGCCGTCGTTTT<br>ACAACGT | ATGTGAGCGAGTAACAA<br>CCCGTCGGATTCT |               |
| <b><i>Apc</i> Wild-type</b>                                | GCCATCCCTTCACGTTAG            | TTCCACTTTGGCATAAGG<br>C            |               |
| <b><i>Apc Min</i> Allele</b>                               | TTCTGAGAAAGACAGAAG<br>TTA     | TTCCACTTTGGCATAAGG<br>C            |               |
| mouse <b><i>Gpr182</i><br/>(Admr)</b>                      |                               |                                    | Mm01946034_s1 |
| mouse <b><i>Lgr5</i></b>                                   |                               |                                    | Mm00438890_m1 |
| mouse <b><i>Olfm4</i></b>                                  |                               |                                    | Mm01320260_m1 |
| mouse <b><i>Bmi1</i></b>                                   |                               |                                    | Mm00776122_g1 |
| mouse <b><i>Lrig1</i></b>                                  |                               |                                    | Mm00456116_m1 |
| mouse <b><i>Tert</i></b>                                   |                               |                                    | Mm00436931_m1 |
| mouse <b><i>Egfr</i></b>                                   |                               |                                    | Mm01187858_m1 |
| mouse <b><i>Ccnd1</i></b>                                  |                               |                                    | Mm00432359_m1 |
| mouse <b><i>Hes1</i></b>                                   |                               |                                    | Mm01342805_m1 |
| mouse <b><i>Chga</i></b>                                   |                               |                                    | Mm00514341_m1 |
| mouse <b><i>Lyz2</i></b>                                   |                               |                                    | Mm01612741_m1 |
| mouse <b><i>18S</i></b>                                    |                               |                                    | Mm03928990_g1 |
| mouse <b><i>β-actin</i></b>                                |                               |                                    | Mm02619580_g1 |
| mouse <b><i>Gapdh</i></b>                                  |                               |                                    | Mm99999915_g1 |
| human <b><i>GPR182</i></b>                                 |                               |                                    | Hm01922099_s1 |
| human <b><i>GAPDH</i></b>                                  |                               |                                    | 4310884E      |

**Supplemental Table 1: RT-PCR and Genotyping Primers and Probes.** All Taqman probes were from Thermo Fisher Scientific or Applied Biosystems.
